# Supplementary material
Source: Springer Nature journal article supplement (https://www.springermedizin.de/resource/supplementary/12985_2011_1492_MOESM3_ESM.pdf/9609978)
Supplement: MOESM3 [file 9609978]

**Table 1:** Clinical data from 5 HIV-1 dual infected individuals

| <b>Case</b> | <b>Institution</b> | <b>Risk category</b>  | <b>Time points</b> | <b>CD4 (cells/ <math>\mu</math>l)</b> | <b>VL (RNA copies/<br/>ml plasma)</b> | <b>HAART*</b>                          |
|-------------|--------------------|-----------------------|--------------------|---------------------------------------|---------------------------------------|----------------------------------------|
| 1           | R. Mejia Hospital  | Bisexual male         | S1                 | NA                                    | $25,3 \times 10^3$                    | d4T 3TC EFV (failure)<br>ddI ZDV SQV/r |
|             |                    |                       | S2                 |                                       | $3,3 \times 10^5$                     |                                        |
| 2           | R. Mejia Hospital  | Bisexual male         | Unique sample      | NA                                    | 446                                   | No                                     |
| 3           | FUNDAI             | Bisexual male         | Unique sample      | >400                                  | <50                                   | ZDV 3TC EFV (effective)                |
| 4           | FUNDAI             | Bisexual male-<br>IDU | S1                 | 447                                   | $57 \times 10^3$                      | No                                     |
|             |                    |                       | S2                 | 905                                   | $82 \times 10^3$                      |                                        |
| 5           | FUNDAI             | IDU                   | S1                 | 453                                   | NA                                    | ddI D4T NVP**                          |
|             |                    |                       | S2                 | 497                                   | $12 \times 10^3$                      |                                        |

\* At the moment of dual infection detection.

\*\* This treatment was two years before sampling.

NA: not available
